# Supplementary material for: A Reappraisal of Ventilatory Thresholds in Wheelchair Athletes With a Spinal Cord Injury: Do They Really Exist?
Source: Front Physiol. 2021 Nov 26;12:719341. doi: 10.3389/fphys.2021.719341 (PMC8664409; doi:10.3389/fphys.2021.719341)
Supplement: Supplementary file 5 [file Table_1.XLSX]

## Sheet: Adjusted R2 model fit
			GAS EXCHANGE THRESHOLD							RESPIRATORY COMPENSATION POINT
			VO2-VCO2			VO2/VE - Time				VCO2-VE			VCO2/VE - Time
	Participant	SCI	Breakpoint model (2 reg lines)	No-breakpoint model (exponential curve)		Breakpoint model (2 reg lines)	No-breakpoint model (2nd order polynomial curve)			Breakpoint model (2 reg lines)	No-breakpoint model (exponential curve)		Breakpoint model (2 reg lines)	No-breakpoint model (2nd order polynomial curve)
	1	Tetra	0.9867	0.9863		0.5531	0.5498			0.9733	0.9729		0.5643	0.5652
	2	Tetra	0.9861	0.9856		0.7379	0.7372			0.9842	0.9835		0.623	0.6232
	3	Tetra	0.992	0.9919		0.6595	0.6427			0.971	0.9701		0.7116	0.674
	4	Tetra	0.9968	0.9967		0.8926	0.8876			0.9861	0.9863		0.8509	0.8425
	5	Tetra	0.9934	0.9927		0.9014	0.8064			0.9821	0.9815		0.7732	0.7663
	6	Tetra	0.9887	0.9879		0.7371	0.7298			0.9833	0.9823		0.6176	0.6091
	7	Tetra	0.9818	0.9815		0.4938	0.4877			0.9843	0.984		0.6522	0.631
	8	Tetra	0.9936	0.9935		0.8843	0.8415			0.994	0.9938		0.7946	0.8117
	9	Tetra	0.9835	0.9828		0.565	0.5531			0.9632	0.9621		0.5876	0.5891
	1	Para	0.993	0.9927		0.9424	0.9394			0.9945	0.9943		0.907	0.9069
	2	Para	0.9905	0.9898		0.7916	0.7636			0.9823	0.9801		0.714	0.6773
	3	Para	0.9791	0.9779		0.9116	0.8847			0.9926	0.9924		0.6896	0.6905
	4	Para	0.9783	0.977		0.6105	0.5815			0.9818	0.9802		0.8721	0.8296
	5	Para	0.9933	0.9927		0.7716	0.7817			0.987	0.9862		0.7727	0.7743
	6	Para	0.9957	0.9954		0.8611	0.8243			0.9825	0.9811		0.7334	0.6818
	7	Para	0.9952	0.9943		0.8972	0.8992			0.9914	0.9913		0.7289	0.7242
	8	Para	0.9883	0.9879		0.9556	0.9239			0.9972	0.9973		0.8156	0.7494
Median			0.9905	0.9898		0.7916	0.7817			0.9842	0.9835		0.7289	0.6905
p75			0.9935	0.9931		0.8993	0.88615			0.992	0.99185		0.8051	0.793
p25			0.9848	0.9842		0.635	0.6121			0.98195	0.98015		0.6376	0.6271
95% CI			0.00331279	0.00338895		0.10064	0.104353			0.00382685	0.00445514		0.0637808	0.0631716

## Sheet: Comparison visual automatic
				% of VO2peak at GET and RCP					% of VO2peak		% of VO2peak			BLa at GET and RCP
	Participant	SCI		VO2-VCO2_Baumgart 2021	VO2/VE - Time_Baumgart 2021	VCO2-VE_Baumgart 2021	VCO2/VE - Time_Baumgart 2021		GET_Leicht 2014		RCP_Leicht 2014			VO2-VCO2_Baumgart 2021	VO2/VE - Time_Baumgart 2021	VCO2-VE_Baumgart 2021	VCO2/VE - Time_Baumgart 2021
	1	Tetra		45.519	35.3607	47.8469	47.6721		73.1		81.5			0.386009	0.492704	0.457902	0.38635
	2	Tetra		66.7458	71.4455	62.5623	73.92		68.9		76.4			0.729081	0.856841	0.841192	0.85997
	3	Tetra		63.563	23.8722	90.9143	37.0605		73.2		-			1.12842	0.809175	3.51894	0.696011
	4	Tetra		69.2108	67.3847	67.3847	64.3996		65.9		69.7			1.1568	0.941168	0.941168	0.91056
	5	Tetra		97.7909	78.411	50.9735	80.3654		58.9		-			3.71268	3.27697	1.0613	3.13379
	6	Tetra		40.0387	104.528	46.4729	103.601		71.7		71.3			0.548811	1.46733	0.578438	1.47893
	7	Tetra		55.4803	76.5971	57.456	35.5431		-		72.3			1.98572	2.55179	1.85794	1.35965
	8	Tetra		74.4853	84.6657	84.6506	62.577		59.1		81.8			1.5645	2.48573	2.5149	0.600482
	9	Tetra		47.3298	54.6972	64.9108	60.1529		61.1		72.8			1.04302	1.05571	1.79494	1.24707
	1	Para		64.4533	61.6847	67.9753	62.3928		69.4		81.9			1.75675	2.41016	2.60099	2.05628
	2	Para		39.7399	48.1636	52.4496	54.2961		65.2		-			0.761186	0.77632	0.766554	0.798831
	3	Para		75.0632	75.2567	54.6149	56.2565		77.7		91.1			1.60484	1.64234	0.874026	1.01125
	4	Para		60.1501	91.872	63.6629	70.7417		87.7		-			0.724375	1.30645	0.731927	0.884067
	5	Para		46.8444	52.2028	66.8255	45.2065		65		70.8			0.648632	0.723187	1.00378	0.544502
	6	Para		43.1783	71.0861	50.2776	73.2165		58.2		61.8			1.28572	3.09951	1.52344	3.004
	7	Para		42.4315	51.638	69.9947	70.1977		62.3		75.4			1.79171	2.32065	3.35748	3.33667
	8	Para		69.8013	88.4431	85.4051	89.5524		73.1		84.8			2.72719	4.64523	3.37639	4.52321
Mean				58.9309	66.9005	63.7869	63.9501		68.1562		76.2769			1.38561	1.81537	1.63537	1.57833
SD				15.9466	20.881	13.3998	17.8276		7.9024		7.73554			0.855297	1.14833	1.05574	1.2044
Paired TTest automatic vs visual				0.0649372	0.735371	0.00303088	0.0660264
Brief description of methods: The % of VO2peak was interpolated for each particpant at the visually identified breakpoints in Leicht at al. (2014) and at the automatically identified breakpoints in Baumgart et al. (2021). While it was possible to identify breakpoints with the automatic fitting prodcedures for all participants and methods in Baumgart et al. (2021), this was not the case for the vi…
